# Supplementary material for: A new type of entangled motif: from 2D polyrotaxane layers to a 3D polythreaded framework
Source: Royal Society of Chemistry journal article supplement (doi:10.1039/c1ce05379e), 2011-01-01
Supplement: c1ce05379e.pdf [file c1ce05379e.pdf]

## **Electronic Supplementary Information**

### **A new type of entangled motif: from 2D polyrotaxane layers to a 3D polythreaded framework**

Hua Wu,<sup>a,b</sup> Bo Liu,<sup>a</sup> Jin Yang,<sup>\*a</sup> Hai-Yan Liu,<sup>a</sup> and Jian-Fang Ma<sup>\*a</sup>

*<sup>a</sup> Key Lab of Polyoxometalate Science, Department of Chemistry, Northeast Normal University, Changchun 130024, People's Republic of China;*

*<sup>b</sup> Heilongjiang Agricultural College of Vocational Technology, Jiamusi, 154007, People's Republic of China*

Corresponding authors:

E-mail: yangjinnenu@yahoo.com.cn (J. Yang)

E-mail: jianfangma@yahoo.com.cn (Jian-Fang Ma)

Fax: +86-431-8509-8620

**Materials.** All reagents and solvents for syntheses were purchased from commercial sources and used as received.

**General Characterization and Physical Measurements.** The powder X-ray diffraction (PXRD) data was collected on a Rigaku RINT2000 diffractometer at room temperature with Cu K $\alpha$  radiation in a flat plate geometry. The FT-IR spectra were recorded from KBr pellets in the range 4000–400 cm<sup>-1</sup> on a Mattson Alpha-Centauri spectrometer.

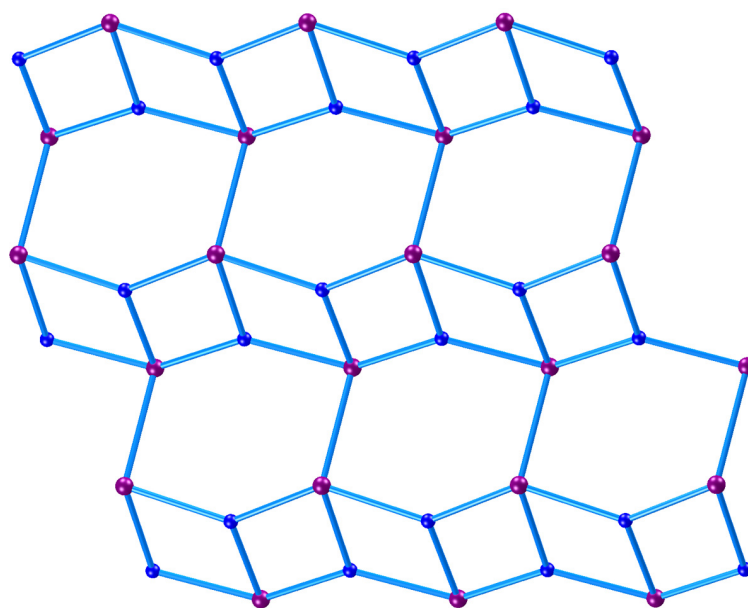

**Fig. S1** Schematic representation of the (3,4)-connected network with a Schläfli symbol of  $(4^2 \cdot 6)(4^2 \cdot 6^3 \cdot 8)$ .

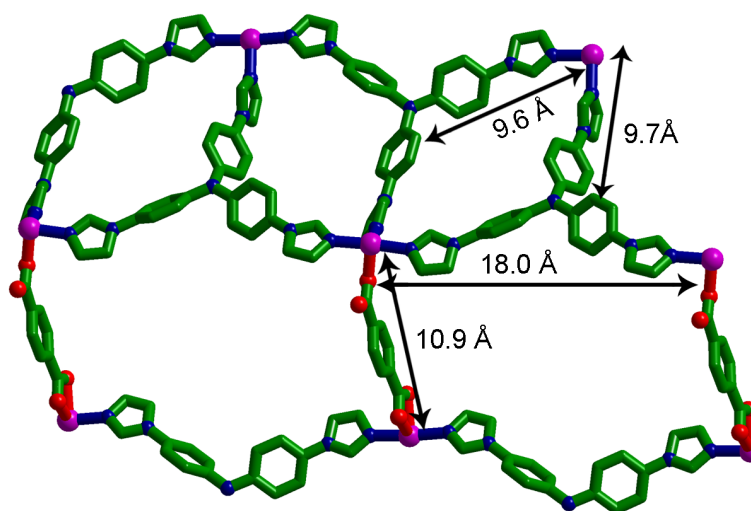

**Fig. S2** A view of two kinds of windows.

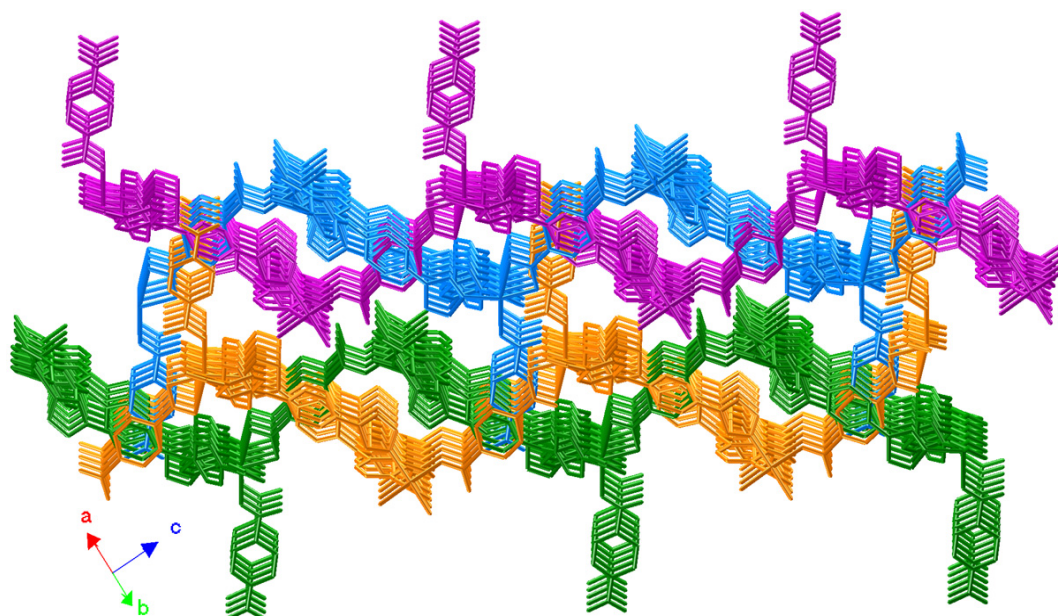

**Fig. S3** View of the 2D  $\rightarrow$  3D polythreaded framework originated from two polyrotaxane layers.

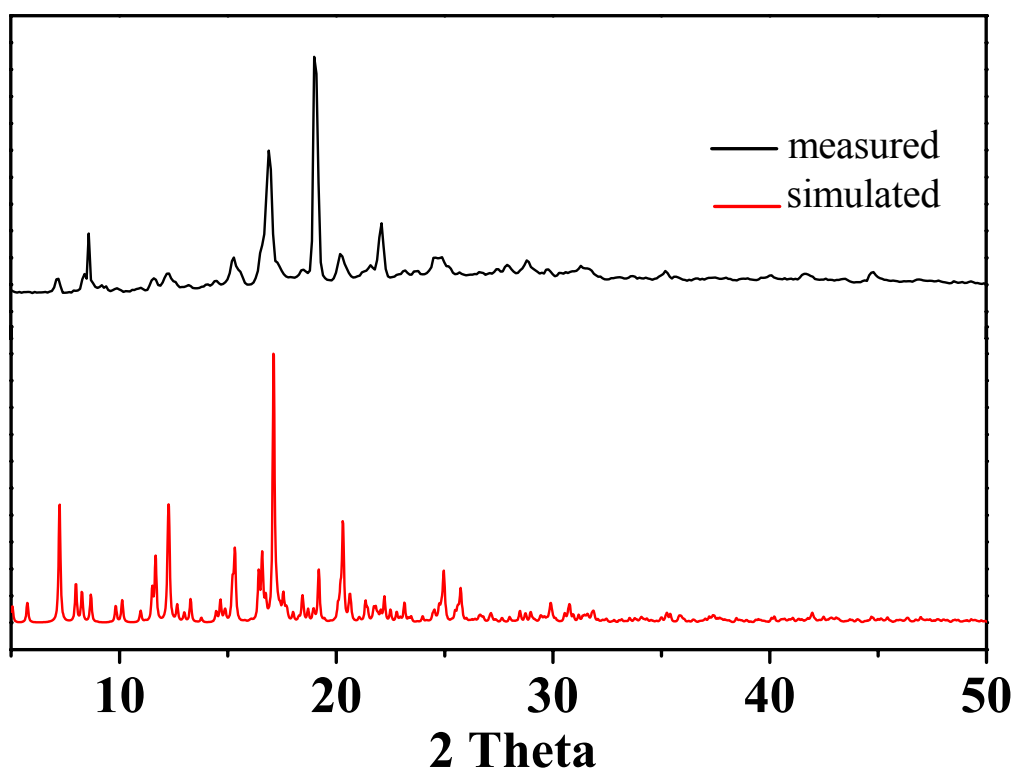

**Fig. S4** Simulated (red) and measured (black) PXR D patterns of **1**.
